# Supplementary material
Source: PubMed Central journal article supplement (PMC3833931)

**Supplementary Figure 1** Plots of the first four principal components. Cases are plotted as grey dots and controls as black triangles. **(A)** Principal components 1 and 2. **(B)** Principal components 3 and 4.

Supplementary Figure 1A

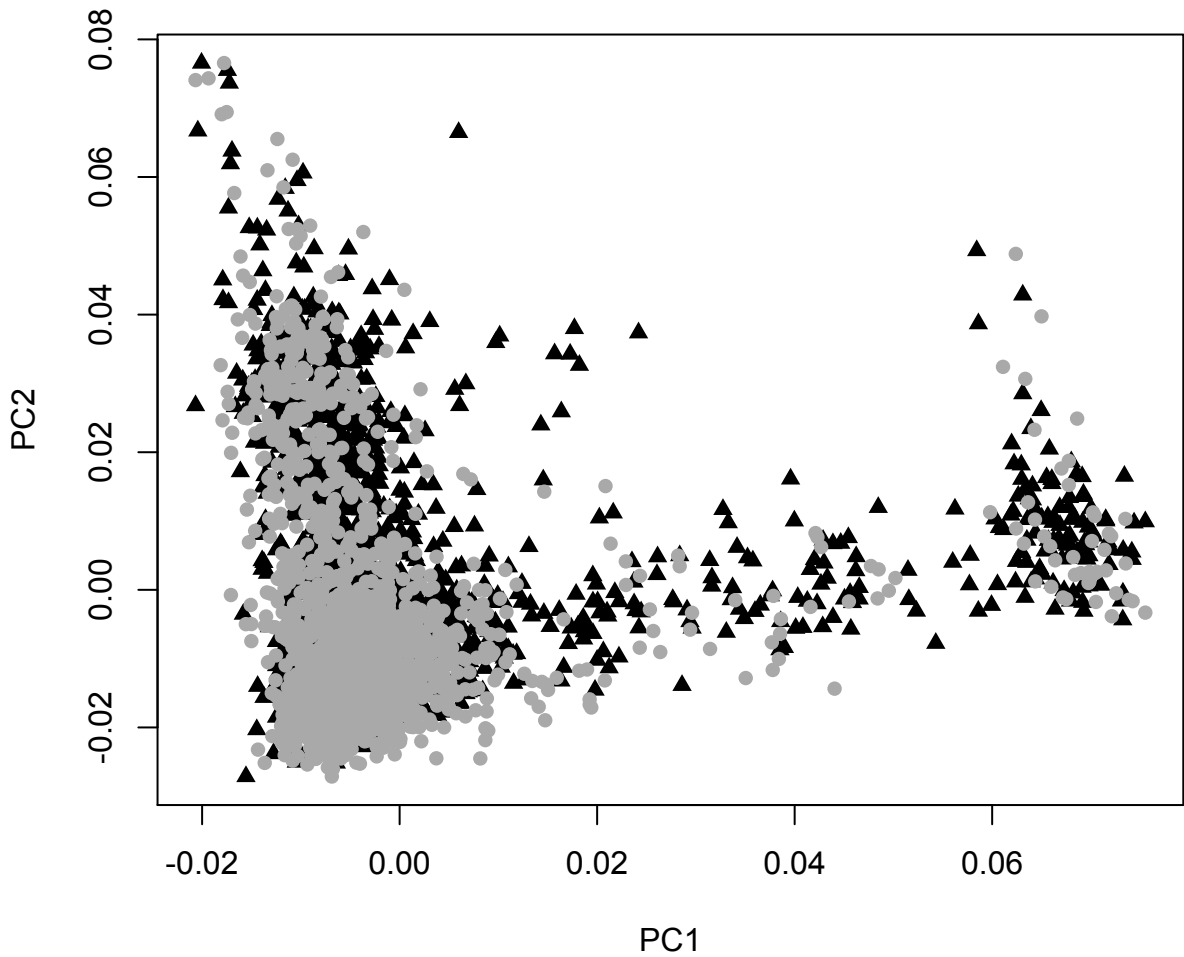

# Supplementary Figure 1B

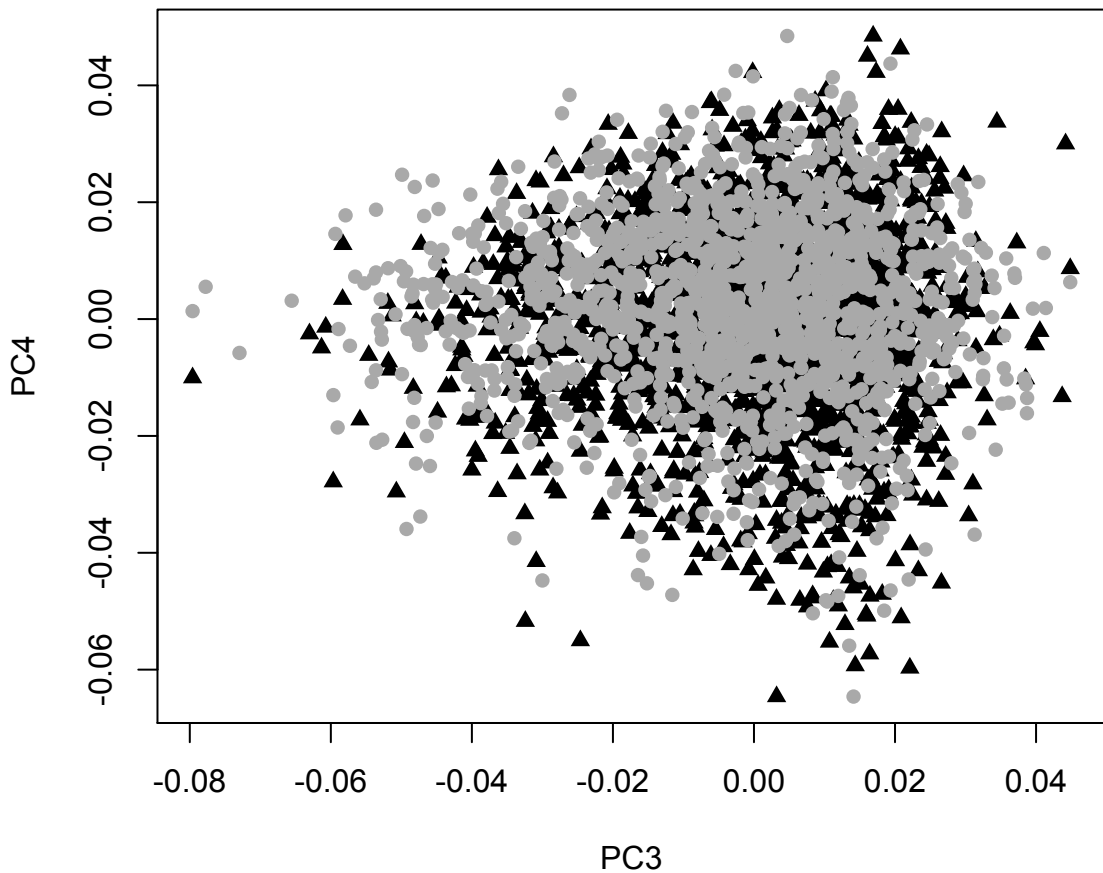

Supplement: supp_djt303_jnci_JNCI_13_0244_s02.pdf [file supp_djt303_jnci_JNCI_13_0244_s02.pdf]
